# Supplementary material for: Hydrothermal synthesis of perovskite CaTiO3 tetragonal microrods with vertical V-type holes along the [010] direction
Source: Royal Society of Chemistry journal article supplement (doi:10.1039/c9ce00726a), 2019-01-01
Supplement: c9ce00726a1.pdf [file c9ce00726a1.pdf]

## supporting information for publication

# Hydrothermal synthesis of the perovskite CaTiO<sub>3</sub> tetragonal microrods with vertical V- type holes along [010] direction

*Tongzhou Chen,<sup>a</sup> Liang Bao,<sup>a,b</sup> Yiran Zheng,<sup>c</sup> Xin Yang,<sup>a,d</sup> Luoyuan Ruan,<sup>a</sup> Yong Liu<sup>\*,a</sup>*

*Gang Xu,<sup>\*,a</sup> Gaorong Han<sup>a</sup>*

a. State Key Laboratory of Silicon Materials and School of Materials Science and Engineering, Zhejiang University, Hangzhou 310027, China

b. College of Materials and Environmental Engineering, Hangzhou Dianzi University, Hang Zhou 310018, P. R. China

c. College of Chemistry and Chemical Engineering, Yantai University, Yantai 264005, China

d. Key Laboratory of Advanced Technique & Preparation for Renewable Energy Materials, Ministry of Education, Yunnan Normal University, Yunnan 650500, China

Corresponding author: [msegxu@zju.edu.cn](mailto:msegxu@zju.edu.cn)

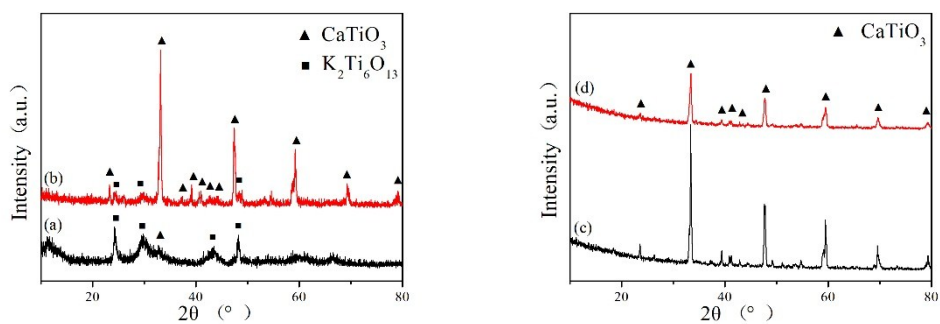

**Figure S1.** XRD patterns of the sample hydrothermally synthesized under different KOH concentrations and time at 200 °C, (a) 1.0 mol/L KOH, 1 h, (b) 1.0 mol/L KOH, 2 h, (c) 0.25 mol/L KOH, 4 h, (d) 2.0 mol/L KOH, 1h
